# Estimating the rate of plasmid transfer in liquid mating cultures

Jana S. Huisman<sup>1,2\*</sup>, Fabienne Benz<sup>1</sup>, Sarah J.N. Duxbury<sup>3</sup>, J. Arjan G.M. de Visser<sup>3</sup>,  
Alex R. Hall<sup>1</sup>, Egil A.J. Fischer<sup>4</sup>, Sebastian Bonhoeffer<sup>1</sup>

<sup>1</sup> Institute of Integrative Biology, ETH Zürich, Zurich, Switzerland

<sup>2</sup> Swiss Institute of Bioinformatics, Lausanne, Switzerland

<sup>3</sup> Laboratory of Genetics, Wageningen University, Wageningen, The Netherlands

<sup>4</sup> Faculty of Veterinary Medicine, Utrecht University, Utrecht, The Netherlands

\* Corresponding author; Email: [jana.huisman@env.ethz.ch](mailto:jana.huisman@env.ethz.ch)

## Abstract

Plasmids are important vectors for the spread of genes among diverse populations of bacteria. However, there is no standard method to determine the rate at which they spread horizontally via conjugation. Here, we compare commonly used methods on simulated data, and show that the conjugation rate estimates often depend strongly on the time of measurement, the initial population densities, or the initial ratio of donor to recipient populations. We derive a new 'end-point' measure to estimate conjugation rates, which extends the Simonsen method to include the effects of differences in population growth and conjugation rates from donors and transconjugants. We further derive analytical expressions for the parameter range in which these approximations remain valid. All tools to estimate conjugation rates are available in an R package and Shiny app. The result is a set of guidelines for easy, accurate, and comparable measurement of conjugation rates and tools to verify these rates.

# 1 Introduction

1 Plasmids are extra-chromosomal, self-replicating genetic elements that can spread between bac-  
2 teria via conjugation. They spread genes within and between bacterial species and are a primary  
3 source of genetic innovation in the prokaryotic realm [1, 2]. Genes disseminated by plasmids include  
4 virulence factors, heavy metal and antibiotic resistance, metabolic genes, as well as genes involved  
5 in cooperation and spite [2, 3, 4, 5]. To understand how these traits shape the ecology and evolution  
6 of bacteria [6], it is of fundamental importance to understand how plasmids spread.

7 The abundance of a plasmid in a population is determined by two factors: (i) the horizontal transmis-  
8 sion of plasmids between neighbouring bacteria (i.e. conjugation) and (ii) the vertical transmission  
9 of a plasmid with its host upon cell division (i.e. clonal expansion). Plasmid conjugation requires  
10 physical contact between donor cells (D), carrying the plasmid, and recipient cells (R), to create  
11 transconjugant cells (T), i.e. recipients carrying the plasmid [1]. The transconjugants then further  
12 contribute to the transfer of the plasmid to recipients. The conjugation rates from transconjugants  
13 can be substantially higher due to transitory derepression of the conjugative pili synthesis [7], and  
14 because transconjugant and recipient cells are the same species with the same restriction modifica-  
15 tion systems [8, 9]. In addition, the rates of clonal expansion of D, R, T populations can differ strongly,  
16 especially when the plasmid is transferred across species boundaries [8].

17 Given the importance of plasmid spread, it is surprising that there is no generally accepted method to  
18 quantify the amount of conjugation that occurs between bacterial populations. Differences between  
19 conjugation assays are dictated by the variety of biological systems in which conjugation occurs (e.g.  
20 different species require different growth medium, some plasmids require solid matrices for conjuga-  
21 tion). All conjugation assays have in common that the donor and recipient cells are cultured together  
22 in or on a specific growth medium for a certain amount of time  $t$ . After this time, the population  
23 densities of the populations D, R, and T are measured. However, assays differ in the experimental  
24 system used - e.g. well-mixed liquid cultures, filters, plates, the gut of vertebrate hosts [8, 10, 11];  
25 the duration of the assay  $t$  - from 1 hour to multiple days [12, 13]; and the way population densities  
26 are measured - e.g. through selective (replica) plating, or flow cytometry [10, 14, 15]. Differences in  
27 the output of such conjugation assays are then further exacerbated when the measured population  
28 densities are related to the amount of conjugation that occurred. Indeed, there is no consensus on  
29 what to call this quantity: commonly used phrases include conjugation frequency [16, 17], plasmid  
30 transfer rate constant [18, 19], or transfer efficiency [14, 15]. More than 10 different methods to  
31 quantify conjugation are currently in use (see Table 1).

32 Many methods are based on the ratio between population densities, such as  $T/D$  or  $T/R$ , to quantify  
33 the fraction of transconjugants at the end of the conjugation assay [12]. However, these measures  
34 vary as a function of the initial population densities, the initial donor to recipient ratio, and the length  
35 of the conjugation assay [13, 18]. Thus, experimental results reported with such measures are not  
36 comparable between studies without detailed information on the experimental conditions [10, 13].  
37 In addition, this ratio is not only determined by a plasmid's conjugation rate, but also by its clonal  
38 expansion [14]. As such, the resulting measurements are not *a priori* comparable across experimen-  
39 tal conditions that could affect the growth rate, including differing nutrient conditions [20], recipient  
40 species [8, 12, 21], temperatures [16], and (sublethal) antibiotic exposure [17]. This limits the predic-  
41 tive power of conjugation proficiency when expressed as a ratio of population densities [14].

42 Population dynamic models were developed specifically to disentangle the influence of horizontal  
43 and vertical plasmid transmission on final population density. In 1979, Levin et al. showed that  
44 conjugation in well-mixed liquid cultures can be accurately described with the mass action kinetics  
45 also used to describe chemical reactions [19]. They described a method to estimate the conjugation  
46 rate from bacterial population densities using linear regression in the exponential or stationary growth  
47 phase [19]. This method was developed further by Simonsen et al. [18], who derived an 'end-  
48 point' formula for the conjugation rate. This method requires a single measurement of  $D$ ,  $R$  and  
49  $T$  population densities at the end of the conjugation assay, as opposed to time-course data.

50 Although the Simonsen method is widely regarded as the most robust method available to estimate  
51 plasmid conjugation rates [13], thirty years after its publication in 1990 an astounding variety of  
52 methods is still in common use (see Table 1). One can speculate whether this slow adoption of  
53 the Simonsen method has been because of a sense of unease with the model-based formulation,  
54 the minor amount of extra work involved in measuring the population growth rate, or the power of  
55 habit in using population density based methods. In addition, all current methods, including the Si-  
56 monsen method, have the drawback that they do not account for differences in growth rates between  
57 strains, nor in differences in conjugation stemming from donors or transconjugants. Fischer et al. [22]  
58 extended the Simonsen model along these lines, but their approach requires time course measure-  
59 ments and a fitting procedure which is sensitive to the initial values of the optimisation. Thus, there  
60 is a clear need to reiterate the drawbacks of population density based methods, and to lower the  
61 barrier to widespread use of better population dynamics based alternatives.

62 Here, we show the limitations of some existing measures of conjugation proficiency on simulated  
63 data, including their dependence on measurement time point, as well as the initial population den-

64 sities and ratios. To mitigate these limitations, we extend the Simonsen model to include the effects  
 65 of differential population growth and conjugation rates from donors and transconjugants. For this  
 66 extended model we derive a new end-point formula as well as the critical time within which these  
 67 approximations are valid. We show how our extended model compares to the original Simonsen  
 68 model as a function of differences in the growth and conjugation rates. To facilitate the calculation of  
 69 conjugation rates from experimental data and to allow testing whether these were measured within  
 70 the critical time, we provide population dynamic models and conjugation rate estimation methods in  
 71 a publicly available R Shiny app. The result is a set of guidelines for easy, accurate, and comparable  
 72 measurement of conjugation rates and tools to verify these rates.

| Measure                                                                         | Units                                          | Mating Culture                          | Name                                                                                                                                                                  |
|---------------------------------------------------------------------------------|------------------------------------------------|-----------------------------------------|-----------------------------------------------------------------------------------------------------------------------------------------------------------------------|
| $\frac{T}{R_0}$                                                                 | dimensionless                                  | Plate [12]                              | Exconjugant frequency [12]                                                                                                                                            |
| $\frac{T}{R}$                                                                   | dimensionless                                  | Filter [23]                             | Gene transfer frequency [23]                                                                                                                                          |
| $\frac{T}{D}$                                                                   | dimensionless                                  | Liquid [16, 24];<br>Filter [17, 21, 23] | (Plasmid) transfer frequency [21];<br>Gene transfer frequency [23];<br>Conjugation frequency [16, 17],<br>Recombinant yield [24], Plasmid<br>transfer efficiency [14] |
| $\frac{T}{N}$                                                                   | dimensionless                                  | Liquid [20]                             | Conjugation frequency based on<br>total bacterial count [20]                                                                                                          |
| $\frac{T+D}{R}$                                                                 | dimensionless                                  | Liquid micro-<br>cosms [25]             | Plasmid prevalence [25]                                                                                                                                               |
| $\frac{T+D}{N}$                                                                 | dimensionless                                  | Soil micro-<br>cosms [26]               | Frequency of plasmid carriage<br>[26]                                                                                                                                 |
| $\frac{T}{R+T}$                                                                 | dimensionless                                  | Liquid [8, 25],<br>Mouse gut [8, 11]    | Proportion of transconjugants [11,<br>25], Fraction of transconjugants<br>(in recipient population) [8]                                                               |
| $\log_{10} \left( \frac{T}{\sqrt{DR}} \right)$                                  | dimensionless                                  | Liquid [27]                             | (Logarithm of) Conjugation rate<br>[27]                                                                                                                               |
| $\frac{T}{DR}$                                                                  | $\frac{\text{ml}}{\text{CFU}}$                 | Filter [28]                             | Transconjugant frequency [28]                                                                                                                                         |
| $\frac{\psi_{max}}{N(b)-N(a)} \ln \left( \frac{D/N+T/R _b}{D/N+T/R _a} \right)$ | $\frac{\text{ml}}{\text{CFU}\cdot\text{hour}}$ | Liquid (batch and<br>chemostat) [19]    | Transfer rate constant [19]                                                                                                                                           |
| $\frac{T}{DR\Delta t}$                                                          | $\frac{\text{ml}}{\text{CFU}\cdot\text{hour}}$ | Liquid [4]                              | Conjugation efficiency [4]                                                                                                                                            |
| $\psi_{max} \ln \left( 1 + \frac{TN}{RD} \right) \frac{1}{(N-N_0)}$             | $\frac{\text{ml}}{\text{CFU}\cdot\text{hour}}$ | Liquid [18], Plate<br>[10, 13]          | (Plasmid) Transfer rate [10, 18],<br>Plasmid transfer efficiency [15],<br>Conjugation rate per mating<br>pair [11], Conjugation coefficient<br>[22]                   |

**Table 1:** Measures of conjugation proficiency and plasmid prevalence or spread reported in the literature. Here  $D, R, T$  stands for the population density of donors, recipients, and transconjugants at the time point of measurement,  $N$  is the total population density  $N = D + R + T$ ,  $N_0$  is the initial total population density,  $R_0$  is the initial population density of recipients,  $\psi_{max}$  is the maximum growth rate of the mating culture. The measures  $(T + D)/R$  or  $(T + D)/N$  are primarily used to test plasmid stability in the population, rather than plasmid invasion from rare or conjugation per se.

## 73 2 Materials and Methods

### 74 Models

#### 75 The Simonsen Model (SM)

76 Simonsen et al. [18] developed a model (the SM) that estimates the conjugation rate from a single  
77 end-point measurement of population densities of the conjugating populations ( $D, R, T$ ), as well as  
78 the joint growth rate ( $\psi_{max}$ ) of these populations. This model includes resource competition between  
79 the populations, and the elegant mathematical solution critically requires the assumption that both  
80 growth and conjugation have the same functional dependency on the resource concentration. The  
81 SM implicitly assumes that conjugation does not occur during the stationary phase. The dynamical  
82 equations are given by:

$$\dot{D} = \psi(C)D \quad (2.1)$$

$$\dot{R} = \psi(C)R - \gamma(C)(T + D)R \quad (2.2)$$

$$\dot{T} = \psi(C)T + \gamma(C)(T + D)R \quad (2.3)$$

$$\dot{C} = -\psi(C)(D + R + T)e \quad (2.4)$$

83 where the designations  $D, R, T$  stand for donors, recipients, and transconjugants respectively,  $\psi(C) =$   
84  $\psi_{max} \frac{C}{C+Q}$  is the growth rate,  $\gamma(C) = \gamma_{max} \frac{C}{C+Q}$  is the conjugation rate,  $C$  is the resource, and  $e$  is the  
85 conversion factor of resource into cells.

86 From this model, Simonsen et al. [18] derived that at any time point during the experiment the follow-  
87 ing relation holds:

$$\gamma_{max} = \psi_{max} \ln\left(1 + \frac{TN}{RD}\right) \frac{1}{(N - N_0)} \quad (2.5)$$

88 where  $N = D + R + T$  is the total population density at the measurement time point,  $N_0$  is the initial  
89 population density, and the growth rate  $\psi_{max}$  should be determined from the conjugating population  
90 during the phase of exponential population growth.

## 91 **The Extended Simonsen Model (ESM)**

92 The SM makes two implicit simplifying assumptions. First, it assumes that donors, recipients and  
 93 transconjugants all have the same growth rate. Second it assumes that the conjugation rate from  
 94 donors to recipients ( $\gamma_{Dmax}$ ) and from transconjugants to recipients ( $\gamma_{Tmax}$ ) is the same. Both of  
 95 these assumptions will not generally be justified. The extended Simonsen model (ESM) thus ex-  
 96 tends the SM to reflect population specific growth rates ( $\psi_{Dmax}, \psi_{Rmax}, \psi_{Tmax}$ ) and conjugation rates  
 97 ( $\gamma_{Dmax}, \gamma_{Tmax}$ ). The dynamical equations are:

$$\dot{D} = \psi_D(C)D \quad (2.6)$$

$$\dot{R} = \psi_R(C)R - (\gamma_T(C)T + \gamma_D(C)D)R \quad (2.7)$$

$$\dot{T} = \psi_T(C)T + (\gamma_T(C)T + \gamma_D(C)D)R \quad (2.8)$$

$$\dot{C} = -(\psi_D(C)D + \psi_R(C)R + \psi_T(C)T)e \quad (2.9)$$

98 where  $\psi_X(C) = \psi_{Xmax} \frac{C}{C+Q}$  are the population specific growth rates (subscript  $X$  stands for  $D, R, T$ ),  
 99 and  $\gamma_Z = \gamma_{Zmax} \frac{C}{C+Q}$  are the conjugation rates from donors or transconjugants (subscript  $Z$  stands  
 100 for  $D, T$ ).

## 101 **The Approximate Extended Simonsen Model (ASM)**

102 We can simplify the equations for the ESM (eqs. 2.6-2.9) by assuming that the growth and conju-  
 103 gation rates are constant until the resource  $C$  is gone and switch to zero in stationary phase. This  
 104 assumption allows one to drop the equation for the resource  $C$  as long as the stationary phase  
 105 has not yet been reached. The dynamical equations of the Approximate Extended Simonsen Model  
 106 (ASM) then become:

$$\dot{D} = \psi_{Dmax}D \quad (2.10)$$

$$\dot{R} = \psi_{Rmax}R - (\gamma_{Tmax}T + \gamma_{Dmax}D)R \quad (2.11)$$

$$\dot{T} = \psi_{Tmax}T + (\gamma_{Tmax}T + \gamma_{Dmax}D)R \quad (2.12)$$

107 Assuming that initially the dynamics of the recipient population are dominated by growth, i.e.  $\psi_{Rmax}R \gg$   
 108  $\gamma_{Tmax}TR + \gamma_{Dmax}DR$ , and that the transconjugant population is not yet dominated by conjugation

109 from transconjugants, i.e.  $\psi_{Tmax}T + \gamma_{Dmax}DR \gg \gamma_{Tmax}TR$ , we obtain that the conjugation rate  
110  $\gamma_{Dmax}$  at a time point  $t$  is given by (see supplementary materials for detailed derivation):

$$\gamma_{Dmax} = (\psi_{Dmax} + \psi_{Rmax} - \psi_{Tmax}) \frac{T(t)}{D(t)R(t) - D_0R_0e^{\psi_{Tmax}t}} \quad (2.13)$$

111 This estimate of the conjugation rate based on the ASM can be used instead of the Simonsen  
112 endpoint formula (eq. 2.5) when the growth rates and conjugation rates differ between populations.  
113 It is valid as long as the approximate solutions are good approximations to the full ODE. In the  
114 supplementary materials we derive the critical time beyond which this approximation of the full ODE  
115 is not sufficient anymore, and the ASM end-point formula starts to break down.

### 116 3 Results

#### 117 Population based methods depend sensitively on the experimental conditions

118 To study the merits of different measures used to quantify conjugation, we test the behaviour of  
119 the most common ones on simulated bacterial population dynamics. To this end, we simulate the  
120 population dynamics using the extended Simonsen model with resource dynamics (ESM) to include  
121 a maximum of biologically relevant detail (see Fig. 1A). Figure 1B shows that population density  
122 based measures vary over many orders of magnitude, depending on when the population densi-  
123 ties are measured. Given the simulated cost of plasmid carriage, the  $T/D$  estimate is higher than  
124  $T/(R + T)$ , although both would give (approximately) the same result if the growth rate of the  $D$   
125 and  $R$  populations were the same. The measure  $\log(T/\sqrt{DR})$  is relatively stable as a function of  
126 the measurement time. However, it is negative as long as  $T$  is smaller than  $D$  and  $R$ , and one has  
127 to take the absolute value to allow comparison with the other conjugation measures. The measure  
128  $T/DR$  performs almost as well as the populations dynamics based measures (SM / ASM). One can  
129 also see that the dimensionless population density based measures are many orders of magnitude  
130 larger than conjugation rates estimated using population dynamic models, as the latter are typically  
131 reported in  $\text{ml} \cdot \text{CFU}^{-1}\text{h}^{-1}$ .

132 As an example of the population-density based measures, we investigate the behaviour of the  $T/D$   
133 method on simulated data. Figure 2 shows that  $T/D$  varies multiple orders of magnitude as a function  
134 of the initial population densities and donor to recipient ratios. This variation is independent of the

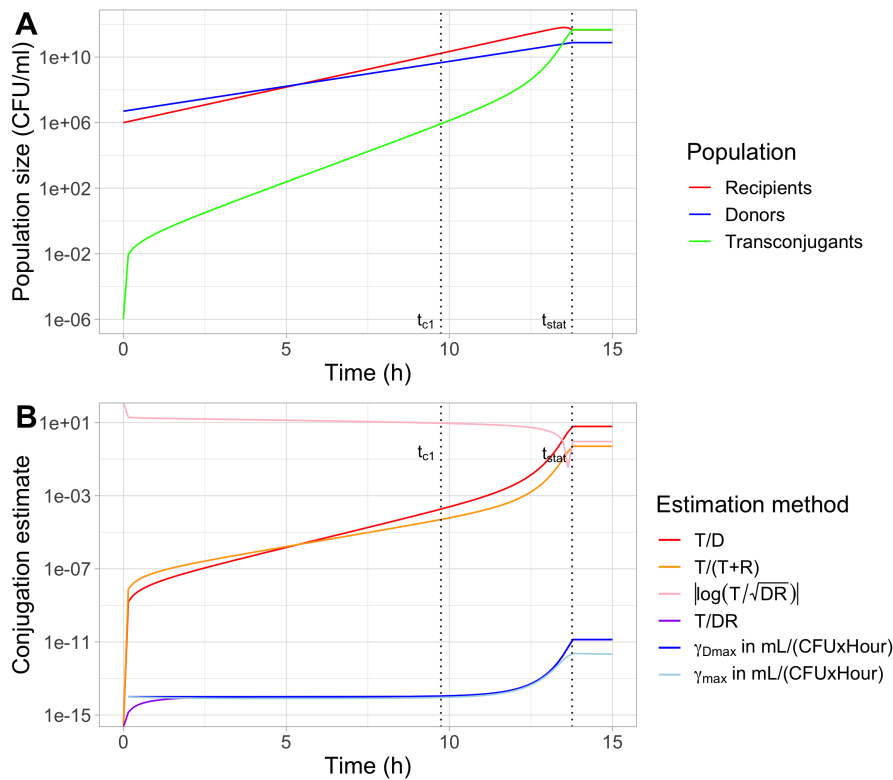

**Figure 1:** Impact of the time point of measurement on the magnitude of conjugation rate estimates. Panel (A) shows the simulated population dynamics; panel (B) shows the corresponding conjugation estimates according to several population density and population dynamics based methods. The SM estimate is denoted by  $\gamma_{max}$  and the ASM estimate by  $\gamma_{Dmax}$ . The T/DR and  $\gamma_{Dmax}$  methods are partially overlaid. The vertical dotted lines indicate the first critical time,  $t_{c1}$ , at which the contribution of conjugation events from transconjugants becomes substantial, and the time  $t_{stat}$  when stationary phase is reached (see supplementary materials). The parameters illustrate a cost of plasmid carriage, and a higher rate of conjugation from transconjugants to recipients than from donors: initial population densities  $R_0 = 1 \cdot 10^6$  CFU/mL,  $D_0 = 5 \cdot 10^6$  CFU/mL; initial resource concentration  $C_0 = 10^{12}$   $\mu$ g/mL; growth rates  $\psi_{Tmax} = \psi_{Dmax} = 0.7$ ,  $\psi_{Rmax} = 1.0$  h<sup>-1</sup>; conjugation rates  $\gamma_{Dmax} = 10^{-14}$  ml · CFU<sup>-1</sup>h<sup>-1</sup>,  $\gamma_{Tmax} = 10^{-11}$  ml · CFU<sup>-1</sup>h<sup>-1</sup>; approximation factor  $f = 10$ .

135 measurement time point. If the initial population densities are manipulated, but the ratio of D:R is  
 136 kept constant at 1:1 (Figure 2A), the  $T/D$  measure declines roughly proportional to the reduced initial  
 137 population density. Instead, if the total population density is kept constant, but the relative ratios of  
 138 recipient and donor densities are varied (Figure 2B), it becomes clear that the  $T/D$  measure declines  
 139 roughly proportional to the change in initial recipient population density.

140 The interpretation of population density based measures such as  $T/D$  is therefore difficult, due to  
 141 their sensitive dependence on initial population densities, donor to recipient ratios, and time of mea-  
 142 surement. In experiments where the experimental condition affects the initial donor and recipient  
 143 population densities or ratios, the measure  $T/D$  will confound this bias with any effect of the exper-  
 144 imental condition on the conjugation rates themselves. More generally, this will also be the case for  
 145 the other population density based measures.



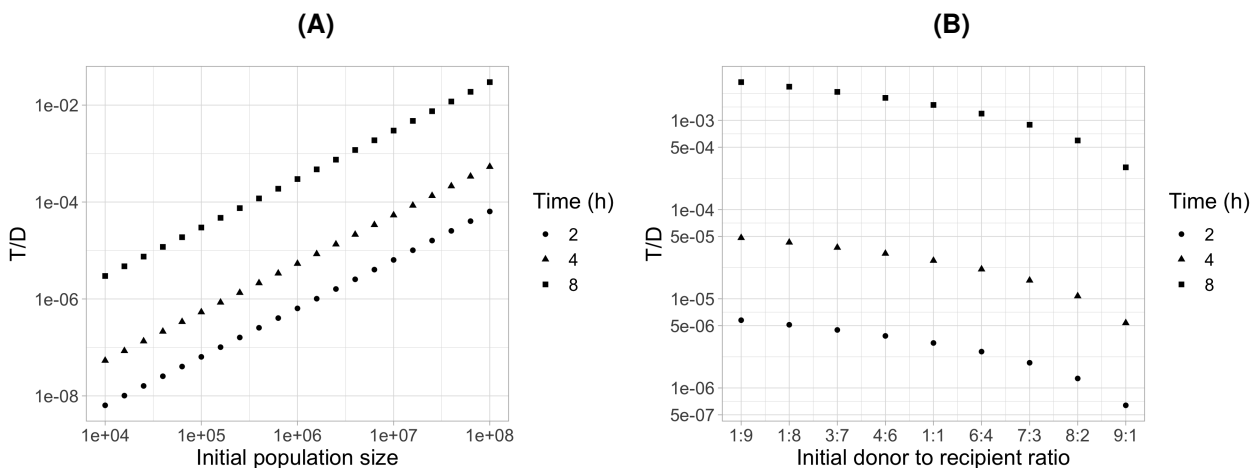

**Figure 2:** Impact of initial population density **(A)**, and donor-recipient ratio **(B)** on the  $T/D$  conjugation frequency estimate. The estimate varies over several orders of magnitude as a function of the initial population densities, relative population densities, and measurement time point. Parameters: initial resource  $C_0 = 10^{14}$   $\mu\text{g/mL}$ ; growth rates  $\psi_{Tmax} = \psi_{Dmax} = \psi_{Rmax} = 1.0 \text{ h}^{-1}$ ; conjugation rates  $\gamma_{T/Dmax} = 10^{-13} \text{ ml} \cdot \text{CFU}^{-1} \text{ h}^{-1}$ . For panel **(A)**, the initial population densities are  $D_0, R_0 \in [10^4, 10^8]$  CFU/mL. Recipient and donor populations are kept at the same density. For panel **(B)**, the ratio between initial population densities is  $D_0 : R_0 \in [9 : 1, 1 : 9]$ , with the total population density constant at  $10^7$  CFU/mL.

#### 146 Extending the Simonsen method

147 We have seen that population-based measures are not robust to variation in (i) the time-duration  
 148 of the assay (Fig. 1B), (ii) initial population densities (Fig. 2A), (iii) and donor to recipient ratios  
 149 (Fig. 2B). The end-point method based on the Simonsen model (SM), which has been around for  
 150 30 years, is robust to these factors. However, this method is not applicable to populations with  
 151 differing growth rates, nor differences in conjugation rates from donors and transconjugants. Thus,  
 152 we extended the SM for differing growth and conjugation rates (see methods section), and derived  
 153 an end-point formula for this new model (the ASM), which is easily computed on experimental data  
 154 (see supplementary materials).

155 In deriving the ASM estimate, we make some assumptions about the relative size of different pro-  
 156 cesses contributing to the overall dynamics of  $D, R$  and  $T$  populations. Some of these assumptions  
 157 are also tacitly made in the SM estimate. Most prominently, this includes the assumptions that (i) the  
 158 recipient population is not substantially reduced due to transformation to transconjugants, and (ii) no  
 159 conjugation takes place in stationary phase. If the rates of conjugation from donors and transcon-  
 160 jugants differ, both the SM and ASM further require that (iii) the populations were measured at a  
 161 time where the dynamics are still dominated by conjugation events between donors and recipients  
 162 rather than between transconjugants and recipients. When these assumptions are no longer valid,  
 163 we expect the SM and ASM estimates for the donor conjugation rate to fail. By making these as-

164 assumptions explicit, we can derive the critical time  $t_{crit}$  beyond which the approximations break down  
 165 (see the supplementary materials). Importantly, this critical time  $t_{crit}$  is the minimum of three different  
 166 time points, reached when one of the approximations (i) or (iii) fails. Which of these time points is  
 167 reached first, and thus which dictates the latest possible measurement time point, depends on the  
 168 relative size of the growth rates ( $\psi_{Dmax}, \psi_{Rmax}, \psi_{Tmax}$ ), conjugation rates ( $\gamma_{Dmax}, \gamma_{Tmax}$ ), as well as  
 169 the initial population densities ( $D_0, R_0$ , see supplementary materials).

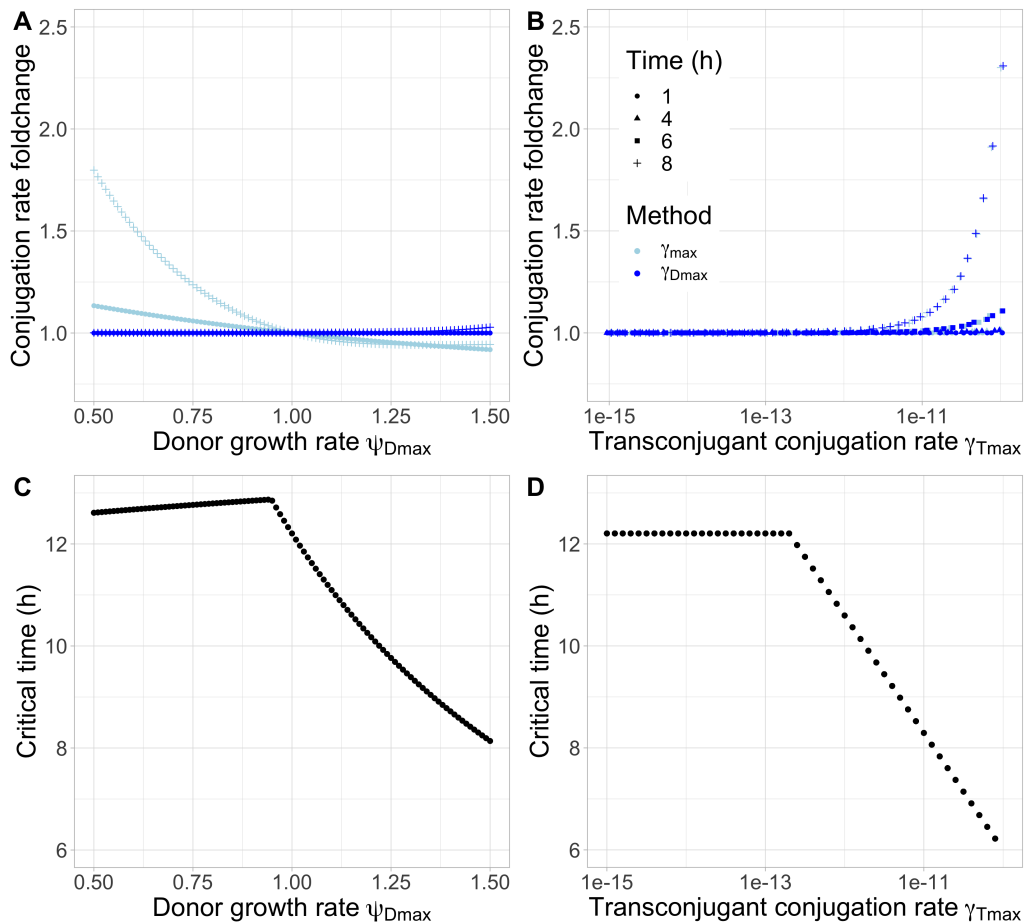

**Figure 3:** Panels (A, B) show the deviation of the estimated conjugation rate from the true value in the simulation, for different measurement time points, as a function of the donor growth rate (A) or transconjugant conjugation rate (B) where  $\gamma_{max}$  denotes the SM estimate and  $\gamma_{Dmax}$  the ASM estimate. Panels (C, D) show the corresponding critical time. Faster donor growth and transconjugant conjugation rates reduce the critical time (C, D), which is mirrored by the greater deviation of the estimated conjugation rates from the true value, i.e. a fold change of 1, for later measurement time points (A, B). For deviating growth rates, the SM always shows a minor estimation error (A), whereas for deviating transconjugant conjugation rates both methods are correct within the critical time (B) (the methods are partially overlaid). Fold change is defined as the ratio between the estimated value and the true value. Parameters: initial population densities  $R_0 = D_0 = 5 \cdot 10^6$  CFU/mL; initial resources  $C_0 = 10^{14}$   $\mu\text{g/mL}$ ; growth rates  $\psi_{Tmax} = \psi_{Rmax} = 1.0 \text{ h}^{-1}$ ; conjugation rate  $\gamma_{Dmax} = 10^{-13} \text{ ml} \cdot \text{CFU}^{-1}\text{h}^{-1}$ ; approximation factor  $f = 10$  are the same for all panels. For panels (A, C), growth rate  $\psi_{Dmax} \in [0.5, 1.5] \text{ h}^{-1}$  and conjugation rate  $\gamma_{Tmax} = 10^{-13} \text{ ml} \cdot \text{CFU}^{-1}\text{h}^{-1}$ ; for panels (B, D), growth rate  $\psi_{Dmax} = 1.0 \text{ h}^{-1}$  and conjugation rate  $\gamma_{Dmax} \in [10^{-15}, 10^{-10}] \text{ ml} \cdot \text{CFU}^{-1}\text{h}^{-1}$ .

170 We use simulated data to investigate whether the ASM estimate improves the conjugation rate esti-

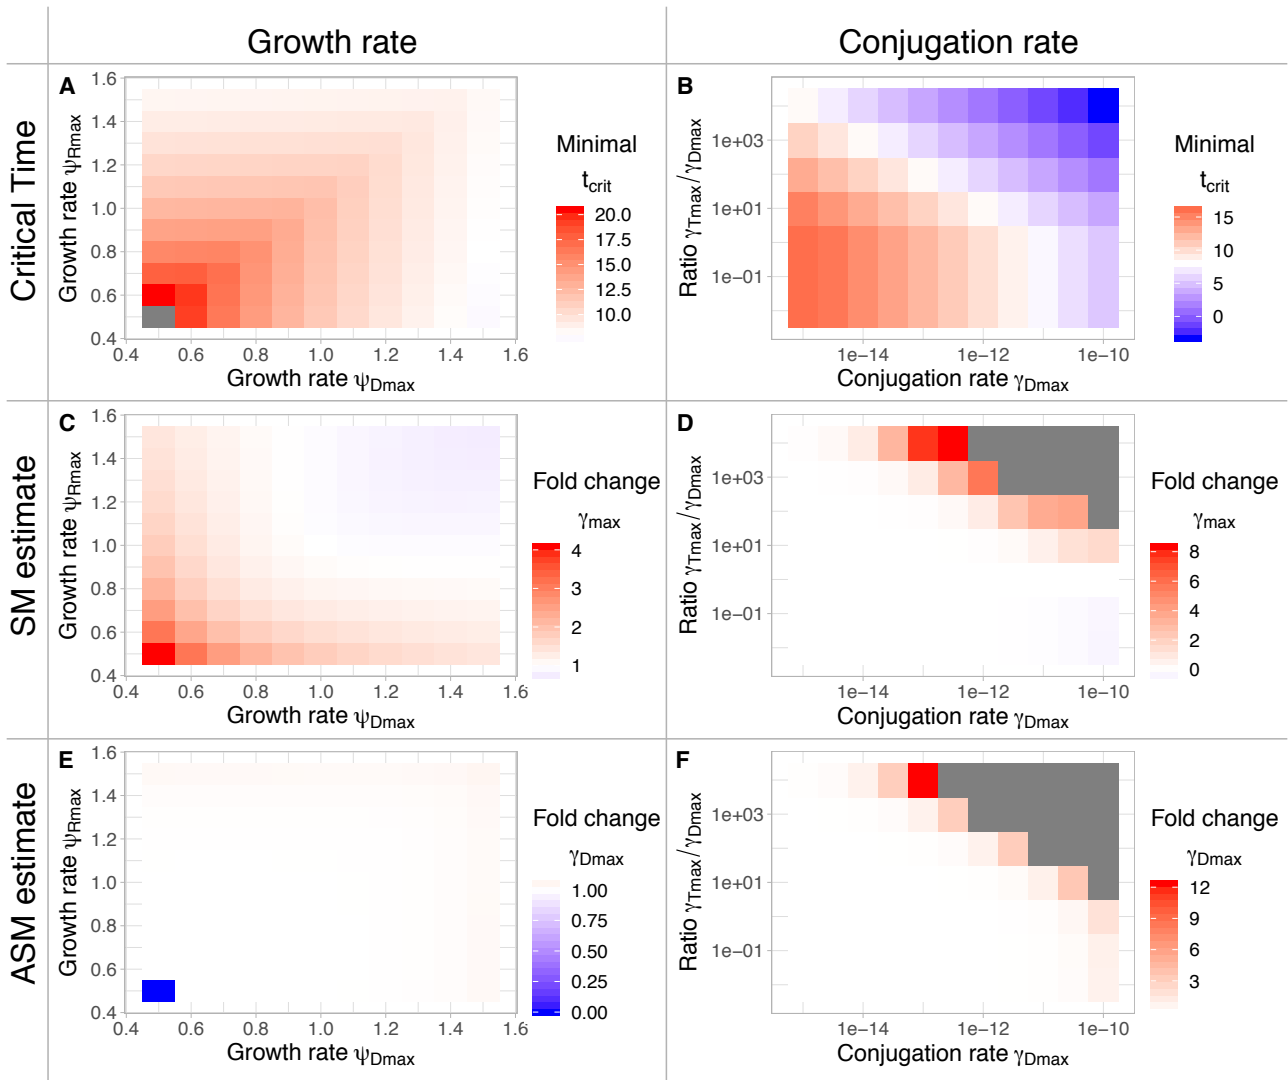

**Figure 4:** The critical time (A, B), SM estimate  $\gamma_{max}$  (C, D), and ASM estimate  $\gamma_{Dmax}$  (E, F), as a function of the growth (First column: (A, C, E)) or conjugation rates (Second column: (B, D, F)). For the estimation (C, D, E, F) we assume the system is measured after 8 hours; the blue regions in panels (A, B) correspond to a critical time below this value. The ratio  $\gamma_{Tmax}/\gamma_{Dmax}$  (B, D, F) indicates how much bigger the rate of conjugation from transconjugants is than that from donors. Fold change is defined as the ratio between the estimated value and the true value. Faster donor growth and transconjugant conjugation rates reduce the critical time (A, B). For deviating growth rates, the SM always shows a minor estimation error (C), whereas for deviating transconjugant conjugation rates both methods are correct within the critical time (B, D, F). The ASM estimate is not valid when  $2\psi_{Tmax} = \psi_{Rmax} = \psi_{Dmax}$ , which leads to the zero value in the lower left corner of panels (A, E). Both the SM and ASM result in numerical errors when measuring substantially above the critical time, upper right corner of panels (D, F). Parameters: initial population densities  $R_0 = D_0 = 5 \cdot 10^6$  CFU/mL; initial resources  $C_0 = 10^{14}$   $\mu\text{g/mL}$ ; growth rate  $\psi_{Tmax} = 1.0$   $\text{h}^{-1}$ ; approximation factor  $f = 10$ . For panels (A, C, E), growth rates  $\psi_{Dmax}, \psi_{Rmax} \in [0.5, 1.5]$   $\text{h}^{-1}$  and conjugation rates  $\gamma_{Dmax} = \gamma_{Tmax} = 10^{-13}$   $\text{ml} \cdot \text{CFU}^{-1}\text{h}^{-1}$ . For panels (B, D, F), growth rates  $\psi_{Dmax} = \psi_{Rmax} = 1.0$   $\text{h}^{-1}$  and conjugation rates  $\gamma_{Dmax} \in [10^{-15}, 10^{-10}]$   $\text{ml} \cdot \text{CFU}^{-1}\text{h}^{-1}$ ,  $\gamma_{Tmax} \in [10^{-17}, 10^{-6}]$   $\text{ml} \cdot \text{CFU}^{-1}\text{h}^{-1}$ .

171 mate in the face of differing (i) growth, and (ii) conjugation rates. Here, we use the fold change, i.e.  
 172 the ratio between the estimated value and the true value of the conjugation rate  $\gamma_{max}$ , to quantify the  
 173 error made during estimation.

174 **Growth** As can be seen in Figures 3A and 4C, the SM estimate varies as a function of the donor  
175 and recipient population growth rate. The SM overestimates the conjugation rate if donor and/or  
176 recipients populations grow more slowly than the transconjugant population (lower left corner of Fig.  
177 4C). If the transconjugants grow more slowly than D and/or R, the SM underestimates the conjugation  
178 rate (upper right corner of Fig. 4C). This is the case for all measurement time points, although the  
179 effect is exacerbated for measurements that are made after a longer conjugation time (Fig. 3A). In  
180 contrast, the new ASM estimate  $\gamma_{Dmax}$  is valid until the critical time  $t_{crit}$ , i.e. the time point for which  
181 the approximations of the model break down (Fig. 4E). The critical time window grows shorter as the  
182 absolute magnitude of the growth rates increases (Fig. 3C, 4A, and S1). Because the critical time is  
183 determined as the minimum of three different processes, all of which depend on the growth rates in  
184 different ways, the process dictating the critical time changes as a function of the growth rate. In Fig.  
185 3C the limiting process is first the early onset of substantial conjugation from transconjugants (time  
186  $t_{c1}$ , see supplementary materials) and then the substantial reduction of the recipient population due  
187 to conjugation events (time  $t_{c2}$ , see supplementary materials).

188 **Conjugation rates** If the rates of conjugation from donors and transconjugants differ, both the SM  
189 and the ASM estimates accurately estimate the donor to recipient conjugation rate, as long as D, R,  
190 T are measured sufficiently early (Fig. 4D/F). This is because the contribution of TRT conjugation  
191 events will be small as long as the transconjugant population is still small. For later times, the  
192 estimated SM conjugation rate  $\gamma_{max}$  will interpolate between  $\gamma_{Dmax}$  and  $\gamma_{Tmax}$ . The estimated time  
193 at which the approximations break down ( $t_{crit}$ ) is the same for both methods (Fig. 4B). As can be  
194 seen in Figures 3B and 4D/F, this means that the magnitude of the misestimation of SM and ASM  
195 estimates depends strongly on the measurement time point. This shows that it is critically important  
196 not to measure too late.

## 197 4 Protocol

198 These theoretical considerations have led us to propose the following protocol to perform conjugation  
199 assays. In its most complete form the protocol requires two conjugation experiments: a first one  
200 starting from a  $D + R$  mixed culture, and then a second one with  $T + R$ . As pointed out in the previous  
201 section, it is important that the population densities of  $D$ ,  $R$  and  $T$  are measured before the critical  
202 time is reached. Strictly speaking, this critical time can only be determined after both conjugation  
203 experiments are completed, as they require an estimate of both conjugation rates ( $\gamma_{Dmax}$ ,  $\gamma_{Tmax}$ ),

204 as well as all growth rates ( $\psi_{Dmax}, \psi_{Rmax}, \psi_{Tmax}$ , see supplementary materials). To optimise the  
205 chance of measuring below the critical time, we recommend to measure as soon as a measurable  
206 number of transconjugants has been formed. Note, if one can assume that the difference between  
207  $\gamma_D$  and  $\gamma_T$  is negligible, then the second conjugation experiment with  $T + R$  is not necessary.

208 • Run 1st experiment with  $D$  and  $R$ :

209 – Grow overnight cultures of  $D$  and  $R$ .

210 – Incubate cultures of  $D$  and  $R$  in isolation and as a mixed culture of  $D + R$ . Measure the  
211 growth rates of all cultures in exponential phase. This yields estimates for the growth rates  
212  $\psi_{Dmax}$  and  $\psi_{Rmax}$  from the single cultures, as well as  $\psi_{max}$  from the mixed culture.

213 – Plate the mixed culture on selective plates at a time point,  $t_1$ , to estimate the population  
214 densities of  $D, R$  and  $T$ . This time point should be early enough, such that there is a high  
215 chance that it is below the critical time  $t_{crit,1}$  for the 1st experiment.

216 – Calculate the ASM estimate for the conjugation rate from donors  $\gamma_{Dmax}$ .

217 – In case you are considering not to perform the 2nd conjugation experiment, you can use  
218 the Shiny app or R package to determine how sensitively the estimate of the conjugation  
219 rate  $\gamma_{Dmax}$  depends on the presumed values of the conjugation rate from transconjugants  
220  $\gamma_{Tmax}$ .

221 • Run 2nd experiment with  $T$  and  $R'$ :

222 – Isolate single transconjugant clones  $T$  from the 1st experiment, to use as plasmid donors  
223 in the 2nd experiment. Either these clones or the recipients used in this 2nd experiment  
224 need to be provided with an additional selective marker such that the transconjugants of  
225 the 2nd experiment ( $T'$ ) can be distinguished from those of the 1st experiment ( $T$ ).

226 – Grow overnight cultures of  $T$  and  $R'$ .

227 – Incubate cultures of  $T$  and  $R'$  in isolation and as a mixed culture of  $T + R'$ . Measure the  
228 growth rates of all cultures in exponential phase. This yields estimates for the growth rates  
229  $\psi_{Tmax}$  from the single cultures, as well as  $\psi_{max}$  from the mixed culture.

230 – Plate the mixed culture on selective plates at a time point,  $t_2$ , to estimate the population  
231 densities of  $T, R'$  and  $T'$ . This time point should be early enough, such that there is a high  
232 chance that it is below the critical time  $t_{crit,2}$  for the 2nd experiment.

- 233 – Estimate the conjugation rate from transconjugants  $\gamma_{Tmax}$ .
- 234 – Check whether  $t_2 < t_{crit,2}$  for the 2nd experiment.
- 235 – If the 2nd experiment is within the critical time, check whether  $t_1 < t_{crit,1}$  for the 1st  
236 experiment.
- 237 – If either  $t_1$  or  $t_2$  are too large, the experiments will need to be repeated, choosing times  
238 smaller than  $t_{crit}$ .

## 239 5 Tools for the scientific community

240 We present a Shiny app (a beta-version is currently available under [https://ibz-shiny.ethz.ch/](https://ibz-shiny.ethz.ch/jhuisman/conjugator/)  
241 [jhuisman/conjugator/](https://ibz-shiny.ethz.ch/jhuisman/conjugator/)), which allows researchers to (i) simulate bacterial population dynamics with  
242 conjugation (ii) upload their own data, calculate conjugation rates, and check whether a given exper-  
243 iment was measured within the critical time. An R package will also be made available soon.

## 244 6 Discussion

245 There is no gold standard to determine and report conjugation rates, and this has complicated the  
246 comparison of experimental values obtained by different research groups or under different condi-  
247 tions [10].

248 We extended the Simonsen model for conjugation rate estimation to include the effects of differential  
249 population growth and conjugation rates from donors and transconjugants. We derived a new end-  
250 point method to estimate conjugation rates under this model, as well as expressions for the critical  
251 time after which this approximation breaks down.

252 A clear conclusion of this work is that one should measure the outcome of conjugation assays early,  
253 before the dynamics become dominated by conjugation from transconjugants. Our critical time gives  
254 an indication of how early this should be.

255 If the donor, recipient, or transconjugant populations differ in their growth rates, the Simonsen model  
256 makes a minor estimation error that is corrected by using our new ASM estimate. When the conju-  
257 gation rate from transconjugants differs substantially from the donor conjugation rate, both methods  
258 estimate a correct conjugation rate up to the critical time. Overall, we find that bacteria with large

259 growth rate differences, high absolute growth rates, and high absolute conjugation rates are most  
260 likely to lead to problems in conjugation rate estimation, as these factors speed up the population  
261 dynamics and reduce the critical time.

262 Several caveats remain for both the SM and the ASM. First, these models are in principle not suitable  
263 for application to mating assays on solid surfaces, as they assume well-mixed conjugating popula-  
264 tions. However, the conjugation rates in high-density, well mixed surface mating experiments are  
265 comparable to liquid mating, provided they are measured sufficiently early [13]. Second, the ASM  
266 assumes that the growth rates in monoculture are predictive for the same strains in mating popu-  
267 lations, and thus disregards competitive effects. Last, neither method includes segregational loss.  
268 These concerns could be addressed by constructing a more complex conjugation and growth model  
269 and fit it to this data [15, 22, 29]. The reason we have chosen an end-point method instead is to  
270 minimise the experimental effort needed, at only a minor cost to the precision of the estimate.

271 We propose to settle on one method to describe conjugation proficiency [14]. Ideally, such a measure  
272 would allow comparison across experimental conditions, and to parametrise mechanistic models  
273 used to explain and predict plasmid dynamics.

## 274 **7 Acknowledgements**

275 We would like to thank Justus Fink and other members of the Theoretical Biology and Pathogen  
276 Ecology groups for helpful discussions. This work was supported by NRP72 SNF grant 407240-  
277 167121, and ZonMw grant 541001005.

## 8 References

- [1] Howard Ochman, Jeffrey G Lawrence, and Eduardo A Groisman. Lateral gene transfer and the nature of bacterial innovation. *Nature*, 405(6784):299, 2000.
- [2] James PJ Hall, Michael A Brockhurst, and Ellie Harrison. Sampling the mobile gene pool: innovation via horizontal gene transfer in bacteria. *Philosophical Transactions of the Royal Society B: Biological Sciences*, 372(1735):20160424, 2017.
- [3] Christian J.H. Von Wintersdorff, John Penders, Julius M. Van Niekerk, Nathan D. Mills, Snehal Majumder, Lieke B. Van Alphen, Paul H.M. Savelkoul, and Petra F.G. Wolffs. Dissemination of antimicrobial resistance in microbial ecosystems through horizontal gene transfer. *Frontiers in Microbiology*, 7(Feb):1–10, 2016.
- [4] Allison J Lopatkin, Shuqiang Huang, Robert P Smith, Jaydeep K Srimani, Tatyana A. Syssoeva, Sharon Bewick, David K. Karig, and Lingchong You. Antibiotics as a selective driver for conjugation dynamics. *Nature Microbiology*, 1(6):16044, June 2016.
- [5] D. J. Rankin, E. P.C. Rocha, and S. P. Brown. What traits are carried on mobile genetic elements, and why. *Heredity*, 106(1):1–10, 2011.
- [6] José Luis Martínez. Ecology and Evolution of Chromosomal Gene Transfer between Environmental Microorganisms and Pathogens. *Microbiology Spectrum*, 6(1):1–16, 2018.
- [7] P. D. Lundquist and B. R. Levin. Transitory derepression and the maintenance of conjugative plasmids. *Genetics*, 113(3):483–497, 1986.
- [8] Fabienne Benz, Jana S Huisman, Erik Bakkeren, Joana A Herter, Tanja Stadler, Martin Ackermann, Médéric Diard, Adrian Egli, Alex R Hall, Wolf-Dietrich Hardt, and Sebastian Bonhoeffer. Extended-spectrum beta-lactamase antibiotic resistance plasmids have diverse transfer rates and can be spread in the absence of selection. *bioRxiv*, 2019.
- [9] Tatiana Dimitriu, Lauren Marchant, Angus Buckling, and Ben Raymond. Bacteria from natural populations transfer plasmids mostly towards their kin. *Proceedings of the Royal Society B: Biological Sciences*, 286(1905):20191110, jun 2019.
- [10] Richard J. Sheppard, Alice E. Beddis, and Timothy G. Barraclough. The role of hosts, plasmids and environment in determining plasmid transfer rates: A meta-analysis. *Plasmid*, 108(March), 2020.
- [11] Erik Bakkeren, Jana S Huisman, Stefan A Fattinger, Annika Hausmann, Markus Furter, Adrian Egli, Emma Slack, Mikael E Sellin, Sebastian Bonhoeffer, Roland R Regoes, Médéric Diard, and Wolf Dietrich Hardt. Salmonella persister promote the spread of antibiotic resistance plasmids in the gut, 2019.
- [12] Fiona Flett, Vassilios Mersinias, and Colin P. Smith. High efficiency intergeneric conjugal transfer of plasmid DNA from *Escherichia coli* to methyl DNA-restricting streptomycetes. *FEMS Microbiology Letters*, 155(2):223–229, 1997.
- [13] Xue Zhong, Jason Drosch, Randal Fox, Eva M. Top, and Stephen M. Krone. On the meaning and estimation of plasmid transfer rates for surface-associated and well-mixed bacterial populations. *Journal of Theoretical Biology*, 294:144–152, 2012.
- [14] Søren J Sørensen, Mark Bailey, Lars H Hansen, Niels Kroer, and Stefan Wuertz. Studying plasmid horizontal transfer in situ: a critical review. *Nature Reviews Microbiology*, 3(9):700–710, 2005.
- [15] David Kneis, Teppo Hiltunen, and Stefanie Heß. A high-throughput approach to the culture-based estimation of plasmid transfer rates. *Plasmid*, 101:28–34, 2019.



- [16] Marta Rozwandowicz, Michael S.M. Brouwer, Lapo Mughini-Gras, Jaap A. Wagenaar, Bruno Gonzalez-Zorn, Dik J. Mevius, and Joost Hordijk. Successful Host Adaptation of IncK2 Plasmids. *Frontiers in Microbiology*, 10(October):1–9, 2019.
- [17] Gang Liu, Karolina Bogaj, Valeria Bortolaia, John Elmerdahl Olsen, and Line Elnif Thomsen. Antibiotic-Induced, Increased Conjugative Transfer Is Common to Diverse Naturally Occurring ESBL Plasmids in *Escherichia coli*. *Frontiers in Microbiology*, 10(September):1–12, 2019.
- [18] Lone Simonsen, D. M. Gordon, F. M. Stewart, and Bruce R. Levin. Estimating the rate of plasmid transfer: an end-point method. *Journal of General Microbiology*, 136(11):2319–2325, 1990.
- [19] Bruce R Levin, Frank M Stewart, and Virginia A Rice. The kinetics of conjugative plasmid transmission: fit of a simple mass action model. *Plasmid*, 2(2):247–260, 1979.
- [20] Eva-Maria Saliu, Marita Eitinger, Jürgen Zentek, and Wilfried Vahjen. Nutrition Related Stress Factors Reduce the Transfer of Extended-Spectrum Beta-Lactamase Resistance Genes between an *Escherichia coli* Donor and a *Salmonella Typhimurium* Recipient In Vitro. *Biomolecules*, 9(8):324, jul 2019.
- [21] P. Trieu-Cuot, C. Carlier, P. Martin, and P. Courvalin. Plasmid transfer by conjugation from *Escherichia coli* to Gram-positive bacteria. *FEMS Microbiology Letters*, 48, 1987.
- [22] Egil A.J. Fischer, Cindy M. Dierikx, Alieda Van Essen-Zandbergen, Herman J.W. Van Roermond, Dik J. Mevius, Arjan Stegeman, and Don Klinkenberg. The IncI1 plasmid carrying the bla CTX-M-1 gene persists in in vitro culture of a *Escherichia coli* strain from broilers. *BMC Microbiology*, 14(1):1–9, 2014.
- [23] Cecilia Dahlberg, Maria Bergström, and Malte Hermansson. In situ detection of high levels of horizontal plasmid transfer in marine bacterial communities. *Applied and Environmental Microbiology*, 64(7):2670–2675, 1998.
- [24] Roy Curtiss, Lucien G Caro, David P Allison, and Donald R Stallions. Early stages of conjugation in *Escherichia coli*. *Journal of bacteriology*, 100(2):1091–1104, 1969.
- [25] Cagla Stevenson, James P J Hall, Michael A Brockhurst, and Ellie Harrison. Plasmid stability is enhanced by higher- frequency pulses of positive selection. *Philosophical Transactions of the Royal Society B: Biological Sciences*, 2018.
- [26] James P. J. Hall, A. Jamie Wood, Ellie Harrison, and Michael A. Brockhurst. Source-sink plasmid transfer dynamics maintain gene mobility in soil bacterial communities. *Proceedings of the National Academy of Sciences*, 113(29):8260–8265, 2016.
- [27] João Alves Gama, Rita Zilhão, and Francisco Dionisio. Multiple plasmid interference - Pledging allegiance to my enemy's enemy. *Plasmid*, 93(August):17–23, 2017.
- [28] Catalina Arango Pinedo and Barth F Smets. Conjugal tol transfer from *Pseudomonas putida* to *Pseudomonas aeruginosa*: effects of restriction proficiency, toxicant exposure, cell density ratios, and conjugation detection method on observed transfer efficiencies. *Appl. Environ. Microbiol.*, 71(1):51–57, 2005.
- [29] Xue Zhong, Jarosław E. Krol, Eva M. Top, and Stephen M. Krone. Accounting for mating pair formation in plasmid population dynamics. *Journal of Theoretical Biology*, 262(4):711–719, 2010.

## 9 Supplementary materials

### 278 9.1 End-point method for the approximate extended Simonsen model

279 We aim to derive a simple end-point method to estimate the conjugation rate from donors, analogous  
 280 to the SM estimate. To do so, we start from the equations for the approximate extended Simonsen  
 281 model (ASM; eqs. 2.10-2.12 in the Methods section). Assuming that (i) initially the recipient pop-  
 282 ulation dynamics are dominated by growth, and that (ii) the transconjugant population is not yet  
 283 dominated by conjugation from transconjugants, i.e.

$$(i) \quad \psi_{Rmax}R \gg \gamma_{Tmax}TR + \gamma_{Dmax}DR \quad (9.1)$$

$$(ii) \quad \psi_{Tmax}T + \gamma_{Dmax}DR \gg \gamma_{Tmax}TR \quad (9.2)$$

We obtain a simplified set of equations given by:

$$\dot{D} = \psi_{Dmax}D \quad (9.3)$$

$$\dot{R} = \psi_{Rmax}R \quad (9.4)$$

$$\dot{T} = \psi_{Tmax}T + \gamma_{Dmax}DR \quad (9.5)$$

284 We solve this for initial conditions corresponding to an ‘invasion from rare’ scenario, i.e.  $D(0) =$   
 285  $D_0$ ,  $R(0) = R_0$  and  $T(0) = 0$ , and get the solution:

$$D(t) = D_0 e^{\psi_{Dmax}t} \quad (9.6)$$

$$R(t) = R_0 e^{\psi_{Rmax}t} \quad (9.7)$$

$$T(t) = \gamma_{Dmax} D_0 R_0 \frac{e^{(\psi_{Dmax} + \psi_{Rmax})t} - e^{\psi_{Tmax}t}}{\psi_{Dmax} + \psi_{Rmax} - \psi_{Tmax}} \quad (9.8)$$

#### 286 Conjugation rate $\gamma_D$

287 This solution for  $T$  (eq. 9.8) contains the conjugation rate  $\gamma_{Dmax}$ . By rearranging the terms, and  
 288 using equations 9.6 and 9.7 to substitute  $D(t)R(t) = D_0 R_0 e^{(\psi_{Dmax} + \psi_{Rmax})t}$ , we obtain an estimate of  
 289 the conjugation rate  $\gamma_{Dmax}$  at a time point  $t$ :

$$\gamma_{Dmax} = (\psi_{Dmax} + \psi_{Rmax} - \psi_{Tmax}) \frac{T(t)}{D(t)R(t) - D_0R_0e^{\psi_{Tmax}t}} \quad (9.9)$$

290 This expression (the ASM estimate) can be used instead of the SM estimate as long as the approxi-  
 291 mate solutions (eqs. 9.6 - 9.8) are good approximations to the full ODE (eqs. 2.10 - 2.12).

### 292 **Critical time** $t_{crit}$

293 In deriving the ASM estimate, we made some approximations (eqs. 9.1 and 9.2) about the relative  
 294 size of different processes contributing to the overall dynamics of  $D$ ,  $R$  and  $T$  populations (leading  
 295 to eqs. 9.6 - 9.8). When these approximations are no longer valid, the ASM estimate for  $\gamma_{Dmax}$  (eq.  
 296 9.9) fails. However, we can calculate the ‘critical time’ beyond which the approximations no longer  
 297 hold.

298 First, the equation for  $T(t)$  (eq. 9.8) fails to approximate the solution of the full ODE (eq. 2.12)  
 299 once conjugation from transconjugants is substantial, i.e. once  $\gamma_{Tmax}T(t)R(t) \approx \psi_{Tmax}T(t) +$   
 300  $\gamma_{Dmax}D(t)R(t)$ . If we specify a factor  $f$  by which the left hand side (conjugation from transconju-  
 301 gants) should be smaller than the right hand side (clonal growth of transconjugants and conjugation  
 302 from donors), we obtain an equation for the time  $t_{c1}$  when the approximation will be violated:

$$f\gamma_{Tmax}R(t_{c1}) = \psi_{Tmax} + \gamma_{Dmax} \frac{D(t_{c1})R(t_{c1})}{T(t_{c1})} \quad (9.10)$$

303 Here we already divided by  $T(t)$  on both sides. For the last term of this equation, we can substitute  
 304 our approximation of  $\gamma_{Dmax}$  (eq. 9.9) to obtain:

$$\gamma_{Dmax} \frac{D(t)R(t)}{T(t)} = (\psi_{Dmax} + \psi_{Rmax} - \psi_{Tmax}) \frac{D(t)R(t)}{D(t)R(t) - D_0R_0e^{\psi_{Tmax}t}} \quad (9.11)$$

$$= (\psi_{Dmax} + \psi_{Rmax} - \psi_{Tmax}) \frac{e^{(\psi_{Dmax} + \psi_{Rmax} - \psi_{Tmax})t}}{e^{(\psi_{Dmax} + \psi_{Rmax} - \psi_{Tmax})t} - 1} \quad (9.12)$$

$$\approx \psi_{Dmax} + \psi_{Rmax} - \psi_{Tmax} \quad (9.13)$$

305 where we first substituted the definitions of  $D(t)$  and  $R(t)$ , and the last equality holds for  $t \gg$   
 306  $1/(\psi_{Dmax} + \psi_{Rmax} - \psi_{Tmax})$ , i.e. at times  $t$  substantially larger than the bacterial doubling time.

Substituting this expression (eq. 9.13) into equation 9.10 we get:

$$f\gamma_{Tmax}R_0e^{\psi_{Rmax}t_{c1}} = \psi_{Tmax} + (\psi_{Dmax} + \psi_{Rmax} - \psi_{Tmax}) \quad (9.14)$$

307 and thus, for the first critical time:

$$t_{c1} = \log\left[\frac{\psi_{Dmax} + \psi_{Rmax}}{f\gamma_{Tmax}R_0}\right]/\psi_{Rmax} \quad (9.15)$$

308 Second,  $R(t)$  (eq. 9.7) fails to approximate the solution of the full ODE once the recipient population  
 309 dynamics are no longer dominated by growth, i.e.  $\psi_{Rmax}R(t) \approx \gamma_{Dmax}D(t)R(t) + \gamma_{Tmax}T(t)R(t)$ .  
 310 To simplify this we break the approximation down into two parts: (i)  $\psi_{Rmax} \approx \gamma_{Dmax}D(t)$  and (ii)  
 311  $\psi_{Rmax} \approx \gamma_{Tmax}T(t)$ . Substituting the above expressions for  $D$  and  $T$  (eqs. 9.6-9.8) into these  
 312 equations we get the following:

$$\psi_{Rmax} = f\gamma_{Dmax}D_0e^{\psi_{Dmax}t_{c2}} \quad (9.16)$$

$$\psi_{Rmax} = f\gamma_{Tmax}\gamma_{Dmax}D_0R_0\frac{e^{(\psi_{Dmax}+\psi_{Rmax})t_{c3}} - e^{\psi_{Tmax}t_{c3}}}{\psi_{Dmax} + \psi_{Rmax} - \psi_{Tmax}} \quad (9.17)$$

313 For the second equation (eq 9.17) we again assume that the time  $t$  is substantially larger than the  
 314 doubling time of the bacteria, i.e.  $t \gg 1/(\psi_{Dmax} + \psi_{Rmax} - \psi_{Tmax})$ , to simplify it to:

$$\psi_{Rmax} = f\gamma_{Tmax}\gamma_{Dmax}D_0R_0\frac{e^{(\psi_{Dmax}+\psi_{Rmax})t_{c3}}}{\psi_{Dmax} + \psi_{Rmax} - \psi_{Tmax}} \quad (9.18)$$

315 By solving equations 9.16 and 9.18 for time, we obtain the two further critical times:

$$t_{c2} = \log\left(\frac{\psi_{Rmax}}{f\gamma_{Dmax}D_0}\right)/\psi_{Dmax} \quad (9.19)$$

$$t_{c3} = \log\left(\frac{\psi_{Rmax}(\psi_{Dmax} + \psi_{Rmax} - \psi_{Tmax})}{f\gamma_{Dmax}\gamma_{Tmax}D_0R_0}\right)/(\psi_{Dmax} + \psi_{Rmax}) \quad (9.20)$$

316 The ASM estimate will lose its validity as soon as one of the three critical times is reached. Depending

317 on the parameters (the relative sizes of growth and conjugation rates, as well as initial population  
 318 densities) this could be any one of  $t_{c1} - t_{c3}$ . With ‘the’ critical time  $t_{crit}$ , we thus refer to the minimum  
 319  $t_{crit} = \min(t_{c1}, t_{c2}, t_{c3})$  of these three time points:

$$t_{c1} = \log\left[\frac{\psi_{Dmax} + \psi_{Rmax}}{f\gamma_{Tmax}R_0}\right]/\psi_{Rmax} \quad (9.21)$$

$$t_{c2} = \log\left(\frac{\psi_{Rmax}}{f\gamma_{Dmax}D_0}\right)/\psi_{Dmax} \quad (9.22)$$

$$t_{c3} = \log\left(\frac{\psi_{Rmax}(\psi_{Dmax} + \psi_{Rmax} - \psi_{Tmax})}{f\gamma_{Dmax}\gamma_{Tmax}D_0R_0}\right)/(\psi_{Dmax} + \psi_{Rmax}) \quad (9.23)$$

## 320 9.2 Stationary phase time

321 Stationary phase is reached at the time  $t_{stat}$  when all initial resources  $C(t = 0) = C_0$  have been  
 322 consumed by the growing bacteria, and converted into biomass; i.e.

$$C_0 = e(N(t_{stat}) - N(0)) \quad (9.24)$$

323 In a general case,  $N(t) = D(t) + R(t) + T(t)$  depends on the growth rate of all three populations,  
 324 and the rate at which recipients are turned into transconjugants. If we substitute our earlier approxi-  
 325 mations for D(t), R(t) and T(t) we get:

$$N(t) = D_0e^{\psi_{Dmax}t} + R_0e^{\psi_{Rmax}t} - \gamma_{Dmax}D_0R_0\frac{e^{(\psi_{Dmax}+\psi_{Rmax})t} - e^{\psi_{Tmax}t}}{\psi_{Dmax} + \psi_{Rmax} - \psi_{Tmax}} \quad (9.25)$$

326 When all populations grow at the same rate  $\psi_{Xmax}$ , any transformation of recipients into transconju-  
 327 gants does not affect the total population growth of N. If we assume simple exponential growth (as  
 328 opposed to e.g. Monod dynamics),  $N(t)$  will be given by:

$$N(t) = N_0e^{\psi_{Xmax}t} = (R_0 + D_0)e^{\psi_{Xmax}t} \quad (9.26)$$

329 With this equation 9.24 becomes:

$$C_0 = eN_0 \left( e^{\psi_{Xmax}t} - 1 \right) \quad (9.27)$$

$$\Rightarrow t_{stat} = \frac{1}{\psi_{Xmax}} \ln \left( 1 + \frac{C_0}{eN_0} \right) \quad (9.28)$$

330 where  $e$  is in  $\mu\text{g}$  per CFU. Population densities  $N, D, T, R, N_0$  in CFU/mL. Resource  $C$  in  $\mu\text{g}$  per mL.  
 331 Growth rate  $\psi_{Xmax}$  is per hour.

332 In cases where we observe the mating population, we can simply replace  $\psi_{Xmax}$  by the growth rate  
 333 of that mixed population ( $\psi_{max}$  from the Simonsen model). If one were to include Monod like growth  
 334 dynamics, this would slow down growth at high population densities/ as the resource is becoming  
 335 depleted. As a result, the start of stationary phase  $t_{stat}$  would be slightly delayed.

### 336 9.3 The impact of higher conjugation rates on conjugation rate estimation

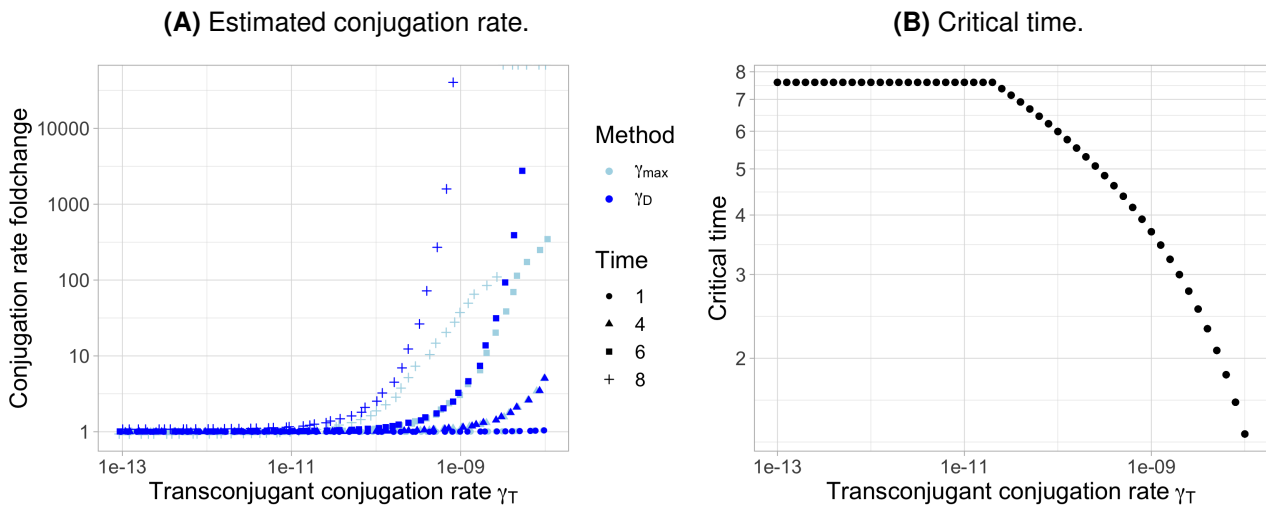

**Figure S1:** Panel (A) shows the ratio between the estimated conjugation rate and the true value in the simulation, for different measurement time points, as a function of the donor growth rate ( $\gamma_{max}$  denotes the SM estimate,  $\gamma_{Dmax}$  the ASM estimate). Panel (B) shows the corresponding critical time. The parameters mimic those in Fig. 3 in the main text, except that the conjugation rates are higher, and thus the temporal dynamics are faster. Initial population densities  $R_0 = D_0 = 5 \cdot 10^6$  CFU/mL; initial resource concentration  $C_0 = 10^{14}$   $\mu\text{g}/\text{mL}$ ; growth rates  $\psi_{Tmax} = \psi_{Dmax} = \psi_{Rmax} = 1.0 \text{ h}^{-1}$ ; conjugation rate  $\gamma_{Dmax} = 10^{-11} \text{ ml} \cdot \text{CFU}^{-1}\text{h}^{-1}$ ; approximation factor  $f = 10$ .
